# Supplementary material for: CRISPR/Cas9‐mediated functional recovery of the recessive rc allele to develop red rice
Source: PubMed Central journal article supplement — Plant Biotechnol J. 2019 May 7;17(11):2096–105. doi: 10.1111/pbi.13125 (PMC6790373; doi:10.1111/pbi.13125), 2019-05-07
Supplement: PBI-17-2096-s002.pdf [file PBI-17-2096-s002.pdf]

|      |                                                                                    |     |
|------|------------------------------------------------------------------------------------|-----|
| Rd   | ATGGACTTCGAGTCCGAGGACCCGGAGAACGAGGTGGTCAAGCCACCGTGAAGGGATGCTGAGCATCATGCGGGCCTG     | 80  |
| X134 | ATGGACTTCGAGTCCGAGGACCCGGAGAACGAGGTGGTCAAGCCACCGTGAAGGGATGCTGAGCATCATGCGGGCCTG     | 80  |
| S143 | ATGGACTTCGAGTCCGAGGACCCGGAGAACGAGGTGGTCAAGCCACCGTGAAGGGATGCTGAGCATCATGCGGGCCTG     | 80  |
| ZNS  | ATGGACTTCGAGTCCGAGGACCCGGAGAACGAGGTGGTCAAGCCACCGTGAAGGGATGCTGAGCATCATGCGGGCCTG     | 80  |
| Rd   | CAGGGACGCCGGCACCCTCAAGCGCATCGTCTTACCTCCTCCGCCGGGACCGTCAACATCGAGGAGCGGCAGCGCCCT     | 160 |
| X134 | CAGGGACGCCGGCACCCTCAAGCGCATCGTCTTACCTCCTCCGCCGGGACCGTCAACATCGAGGAGCGGCAGCGCCCT     | 160 |
| S143 | CAGGGACGCCGGCACCCTCAAGCGCATCGTCTTACCTCCTCCGCCGGGACCGTCAACATCGAGGAGCGGCAGCGCCCT     | 160 |
| ZNS  | CAGGGACGCCGGCACCCTCAAGCGCATCGTCTTACCTCCTCCGCCGGGACCGTCAACATCGAGGAGCGGCAGCGCCCT     | 160 |
| Rd   | CCTACGACCACGACGACTGGAGCGACATCGACTTCTGCCGCCGCGTCAAGATGACCGGATGGATGTACTTCGTGTCCAAG   | 240 |
| X134 | CCTACGACCACGACGACTGGAGCGACATCGACTTCTGCCGCCGCGTCAAGATGACCGGATGGATGTACTTCGTGTCCAAG   | 240 |
| S143 | CCTACGACCACGACGACTGGAGCGACATCGACTTCTGCCGCCGCGTCAAGATGACCGGATGGATGTACTTCGTGTCCAAG   | 240 |
| ZNS  | CCTACGACCACGACGACTGGAGCGACATCGACTTCTGCCGCCGCGTCAAGATGACCGGATGGATGTACTTCGTGTCCAAG   | 240 |
| Rd   | TCATTGGCGGAGAAGGCCGCCATGGAATACGCGAGGGAGCAGGGCTGGACCTCATCAGCGTCATCCCCACGCTCGTCGT    | 320 |
| X134 | TCATTGGCGGAGAAGGCCGCCATGGAATACGCGAGGGAGCAGGGCTGGACCTCATCAGCGTCATCCCCACGCTCGTCGT    | 320 |
| S143 | TCATTGGCGGAGAAGGCCGCCATGGAATACGCGAGGGAGCAGGGCTGGACCTCATCAGCGTCATCCCCACGCTCGTCGT    | 320 |
| ZNS  | TCATTGGCGGAGAAGGCCGCCATGGAATACGCGAGGGAGCAGGGCTGGACCTCATCAGCGTCATCCCCACGCTCGTCGT    | 320 |
| Rd   | CGGGCCCTTCATCAGCAACGGGATGCCGCCGAGCCAGTCAACCGCTGGCGCTGCTCACGGGAAACGAGGCCACTACT      | 400 |
| XS34 | CGGGCCCTTCATCAGCAACGGGATGCCGCCGAGCCAGTCAACCGCTGGCGCTGCTCACGGGAAACGAGGCCACTACT      | 400 |
| S143 | CGGGCCCTTCATCAGCAACGGGATGCCGCCGAGCCAGTCAACCGCTGGCGCTGCTCACGGGAAACGAGGCCACTACT      | 400 |
| ZNS  | CGGGCCCTTCATCAGCAACGGGATGCCGCCGAGCCAGTCAACCGCTGGCGCTGCTCACGGGAAACGAGGCCACTACT      | 400 |
| Rd   | CGATCCTGAAGCAGGTGCAGTTCGTCCACCTCGACGACCTTTCGCGACGCCGAGATCTTCCTCTTCGAGAGCCCCGAGGCG  | 480 |
| X134 | CGATCCTGAAGCAGGTGCAGTTCGTCCACCTCGACGACCTTTCGCGACGCCGAGATCTTCCTCTTCGAGAGCCCCGAGGCG  | 480 |
| S143 | CGATCCTGAAGCAGGTGCAGTTCGTCCACCTCGACGACCTTTCGCGACGCCGAGATCTTCCTCTTCGAGAGCCCCGAGGCG  | 480 |
| ZNS  | CGATCCTGAAGCAGGTGCAGTTCGTCCACCTCGACGACCTTTCGCGACGCCGAGATCTTCCTCTTCGAGAGCCCCGAGGCG  | 480 |
| Rd   | CGCGGCCGCTACGTCTGCTCCTCCACGACGCCACCATCCACGGCTCGCGACGATGCTCGCGGACATGTTCCCGGAGTA     | 560 |
| X134 | CGCGGCCGCTACGTCTGCTCCTCCACGACGCCACCATCCACGGCTCGCGACGATGCTCGCGGACATGTTCCCGGAGTA     | 560 |
| S143 | CGCGGCCGCTACGTCTGCTCCTCCACGACGCCACCATCCACGGCTCGCGACGATGCTCGCGGACATGTTCCCGGAGTA     | 560 |
| ZNS  | CGCGGCCGCTACGTCTGCTCCTCCACGACGCCACCATCCACGGCTCGCGACGATGCTCGCGGACATGTTCCCGGAGTA     | 560 |
| Rd   | CGACGTGCCCGGAGCTTCCCGGGATCGACGCCGACCCTCCAGCCGGTGCACCTTCTCGTCTGGAAGCTCCTCGCCC       | 640 |
| X134 | CGACGTGCCCGGAGCTTCCCGGGATCGACGCCGACCCTCCAGCCGGTGCACCTTCTCGTCTGGAAGCTCCTCGCCC       | 640 |
| S143 | CGACGTGCCCGGAGCTTCCCGGGATCGACGCCGACCCTCCAGCCGGTGCACCTTCTCGTCTGGAAGCTCCTCGCCC       | 640 |
| ZNS  | CGACGTGCCCGGAGCTTCCCGGGATCGACGCCGACCCTCCAGCCGGTGCACCTTCTCGTCTGGAAGCTCCTCGCCC       | 640 |
| Rd   | ACGGGTTTCAGGTTTCAGGTACACGCTGGAGGACATGTTTCGAGGCCCGCTCCGGACGTGCAGGGAGAAGGGGCTTCTCCCG | 720 |
| X134 | ACGGGTTTCAGGTTTCAGGTACACGCTGGAGGACATGTTTCGAGGCCCGCTCCGGACGTGCAGGGAGAAGGGGCTTCTCCCG | 720 |
| S143 | ACGGGTTTCAGGTTTCAGGTACACGCTGGAGGACATGTTTCGAGGCCCGCTCCGGACGTGCAGGGAGAAGGGGCTTCTCCCG | 720 |
| ZNS  | ACGGGTTTCAGGTTTCAGGTACACGCTGGAGGACATGTTTCGAGGCCCGCTCCGGACGTGCAGGGAGAAGGGGCTTCTCCCG | 720 |
| Rd   | CCGTGCGGCCACCCGCCGACGACGCCGCTGGCCGGAGGAGACGGCTCGCGGGTGTGGCCGGCAGAGAAGGAACCGATACT   | 800 |
| X134 | CCGTGCGGCCACCCGCCGACGACGCCGCTGGCCGGAGGAGACGGCTCGCGGGTGTGGCCGGCAGAGAAGGAACCGATACT   | 800 |
| S143 | CCGTGCGGCCACCCGCCGACGACGCCGCTGGCCGGAGGAGACGGCTCGCGGGTGTGGCCGGCAGAGAAGGAACCGATACT   | 800 |
| ZNS  | CCGTGCGGCCACCCGCCGACGACGCCGCTGGCCGGAGGAGACGGCTCGCGGGTGTGGCCGGCAGAGAAGGAACCGATACT   | 800 |
| Rd   | GGGGAGGGGGACCGGACGGCGGTTGGTGTGAAACAGAAGCGTTGGTCAAATGA                              | 855 |
| X134 | GGGGAGGGGGACCGGACGGCGGTTGGTGTGAAACAGAAGCGTTGGTCAAATGA                              | 855 |
| S143 | GGGGAGGGGGACCGGACGGCGGTTGGTGTGAAACAGAAGCGTTGGTCAAATGA                              | 855 |
| ZNS  | GGGGAGGGGGACCGGACGGCGGTTGGTGTGAAACAGAAGCGTTGGTCAAATGA                              | 855 |

**Supplemental Figure 2. Multiple alignment of the coding regions of the *Rd* gene in wild red rice (*Oryza rufipogon*), and three white pericarp rice varieties X134, S143, and ZNS.**
