# Supplementary material for: CRISPR/Cas9‐mediated functional recovery of the recessive rc allele to develop red rice
Source: PubMed Central journal article supplement — Plant Biotechnol J. 2019 May 7;17(11):2096–105. doi: 10.1111/pbi.13125 (PMC6790373; doi:10.1111/pbi.13125), 2019-05-07
Supplement: PBI-17-2096-s003.pdf [file PBI-17-2096-s003.pdf]

|              |                                                                              |    |
|--------------|------------------------------------------------------------------------------|----|
| Rc           | MAGGEAHAALQAVASLRWYSLWQLCPHQGSSLVWEGHYNGAVKTRKSTVMQPPAAEEEDDADHAARHRSRQLRELY | 80 |
| rc           | MAGGEAHAALQAVASLRWYSLWQLCPHQGSSLVWEGHYNGAVKTRKSTVMQPPAAEEEDDADHAARHRSRQLRELY | 80 |
| X134-#2†     | MAGGEAHAALQAVASLRWYSLWQLCPHQGSSLVWEGHYNGAVKTRKSTVMQPPAAEEEDDADHAARHRSRQLRELY | 80 |
| X134-#5      | MAGGEAHAALQAVASLRWYSLWQLCPHQGSSLVWEGHYNGAVKTRKSTVMQPPAAEEEDDADHAARHRSRQLRELY | 80 |
| X134-#9 (2)  | MAGGEAHAALQAVASLRWYSLWQLCPHQGSSLVWEGHYNGAVKTRKSTVMQPPAAEEEDDADHAARHRSRQLRELY | 80 |
| X134-#11     | MAGGEAHAALQAVASLRWYSLWQLCPHQGSSLVWEGHYNGAVKTRKSTVMQPPAAEEEDDADHAARHRSRQLRELY | 80 |
| S143-#14     | MAGGEAHAALQAVASLRWYSLWQLCPHQGSSLVWEGHYNGAVKTRKSTVMQPPAAEEEDDADHAARHRSRQLRELY | 80 |
| S143-#15‡    | MAGGEAHAALQAVASLRWYSLWQLCPHQGSSLVWEGHYNGAVKTRKSTVMQPPAAEEEDDADHAARHRSRQLRELY | 80 |
| S143-#25     | MAGGEAHAALQAVASLRWYSLWQLCPHQGSSLVWEGHYNGAVKTRKSTVMQPPAAEEEDDADHAARHRSRQLRELY | 80 |
| S143-#31 (1) | MAGGEAHAALQAVASLRWYSLWQLCPHQGSSLVWEGHYNGAVKTRKSTVMQPPAAEEEDDADHAARHRSRQLRELY | 80 |
| S143-#32     | MAGGEAHAALQAVASLRWYSLWQLCPHQGSSLVWEGHYNGAVKTRKSTVMQPPAAEEEDDADHAARHRSRQLRELY | 80 |
| ZNS-#15      | MAGGEAHAALQAVASLRWYSLWQLCPHQGSSLVWEGHYNGAVKTRKSTVMQPPAAEEEDDADHAARHRSRQLRELY | 80 |
| ZNS-#25      | MAGGEAHAALQAVASLRWYSLWQLCPHQGSSLVWEGHYNGAVKTRKSTVMQPPAAEEEDDADHAARHRSRQLRELY | 80 |

|              |                                                                                 |     |
|--------------|---------------------------------------------------------------------------------|-----|
| Rc           | DWLQAGENS SGGVQTSSTASRRPGAALSPEDLTETEWFFLMSASYSFPPGIGLPGRAFARRGHVWLTGANEVDSKVFL | 160 |
| rc           | DWLQAGENS SGGVQTSSTASRRPGAALSPEDLTETEWFFLMSASYSFPPGIGLPGRAFARRGHVWLTGANEVDSKVFL | 160 |
| X134-#2      | DWLQAGENS SGGVQTSSTASRRPGAALSPEDLTETEWFFLMSASYSFPPGIGLPGRAFARRGHVWLTGANEVDSKVFL | 160 |
| X134-#5      | DWLQAGENS SGGVQTSSTASRRPGAALSPEDLTETEWFFLMSASYSFPPGIGLPGRAFARRGHVWLTGANEVDSKVFL | 160 |
| X134-#9 (2)  | DWLQAGENS SGGVQTSSTASRRPGAALSPEDLTETEWFFLMSASYSFPPGIGLPGRAFARRGHVWLTGANEVDSKVFL | 160 |
| X134-#11     | DWLQAGENS SGGVQTSSTASRRPGAALSPEDLTETEWFFLMSASYSFPPGIGLPGRAFARRGHVWLTGANEVDSKVFL | 160 |
| S143-#14     | DWLQAGENS SGGVQTSSTASRRPGAALSPEDLTETEWFFLMSASYSFPPGIGLPGRAFARRGHVWLTGANEVDSKVFL | 160 |
| S143-#15     | DWLQAGENS SGGVQTSSTASRRPGAALSPEDLTETEWFFLMSASYSFPPGIGLPGRAFARRGHVWLTGANEVDSKVFL | 160 |
| S143-#25     | DWLQAGENS SGGVQTSSTASRRPGAALSPEDLTETEWFFLMSASYSFPPGIGLPGRAFARRGHVWLTGANEVDSKVFL | 160 |
| S143-#31 (1) | DWLQAGENS SGGVQTSSTASRRPGAALSPEDLTETEWFFLMSASYSFPPGIGLPGRAFARRGHVWLTGANEVDSKVFL | 160 |
| S143-#32     | DWLQAGENS SGGVQTSSTASRRPGAALSPEDLTETEWFFLMSASYSFPPGIGLPGRAFARRGHVWLTGANEVDSKVFL | 160 |
| ZNS-#15      | DWLQAGENS SGGVQTSSTASRRPGAALSPEDLTETEWFFLMSASYSFPPGIGLPGRAFARRGHVWLTGANEVDSKVFL | 160 |
| ZNS-#25      | DWLQAGENS SGGVQTSSTASRRPGAALSPEDLTETEWFFLMSASYSFPPGIGLPGRAFARRGHVWLTGANEVDSKVFL | 160 |

|              |                                                                                     |     |
|--------------|-------------------------------------------------------------------------------------|-----|
| Rc           | RAILAKTVVCI PVVDGVLEIGTTEKVEEDMGLIQYARGIFMDQHG IHMKPTLSQHSSTNPVTHCTHQHP IQVQMQLGITS | 240 |
| rc           | RAILAKTVVCI PVVDGVLEIGTTEKVEEDMGLIQYARGIFMDQHG IHMKPTLSQHSSTNPVTHCTHQHP IQVQMQLGITS | 240 |
| X134-#2      | RAILAKTVVCI PVVDGVLEIGTTEKVEEDMGLIQYARGIFMDQHG IHMKPTLSQHSSTNPVTHCTHQHP IQVQMQLGITS | 240 |
| X134-#5      | RAILAKTVVCI PVVDGVLEIGTTEKVEEDMGLIQYARGIFMDQHG IHMKPTLSQHSSTNPVTHCTHQHP IQVQMQLGITS | 240 |
| X134-#9 (2)  | RAILAKTVVCI PVVDGVLEIGTTEKVEEDMGLIQYARGIFMDQHG IHMKPTLSQHSSTNPVTHCTHQHP IQVQMQLGITS | 240 |
| X134-#11     | RAILAKTVVCI PVVDGVLEIGTTEKVEEDMGLIQYARGIFMDQHG IHMKPTLSQHSSTNPVTHCTHQHP IQVQMQLGITS | 240 |
| S143-#14     | RAILAKTVVCI PVVDGVLEIGTTEKVEEDMGLIQYARGIFMDQHG IHMKPTLSQHSSTNPVTHCTHQHP IQVQMQLGITS | 240 |
| S143-#15     | RAILAKTVVCI PVVDGVLEIGTTEKVEEDMGLIQYARGIFMDQHG IHMKPTLSQHSSTNPVTHCTHQHP IQVQMQLGITS | 240 |
| S143-#25     | RAILAKTVVCI PVVDGVLEIGTTEKVEEDMGLIQYARGIFMDQHG IHMKPTLSQHSSTNPVTHCTHQHP IQVQMQLGITS | 240 |
| S143-#31 (1) | RAILAKTVVCI PVVDGVLEIGTTEKVEEDMGLIQYARGIFMDQHG IHMKPTLSQHSSTNPVTHCTHQHP IQVQMQLGITS | 240 |
| S143-#32     | RAILAKTVVCI PVVDGVLEIGTTEKVEEDMGLIQYARGIFMDQHG IHMKPTLSQHSSTNPVTHCTHQHP IQVQMQLGITS | 240 |
| ZNS-#15      | RAILAKTVVCI PVVDGVLEIGTTEKVEEDMGLIQYARGIFMDQHG IHMKPTLSQHSSTNPVTHCTHQHP IQVQMQLGITS | 240 |
| ZNS-#25      | RAILAKTVVCI PVVDGVLEIGTTEKVEEDMGLIQYARGIFMDQHG IHMKPTLSQHSSTNPVTHCTHQHP IQVQMQLGITS | 240 |

|              |                                                                                 |     |
|--------------|---------------------------------------------------------------------------------|-----|
| Rc           | QTKFDYSDELNADEENDTTEEGMSGSDTNNDTERNSGQLQLQMQDQLNMVSNHDQTIPNNAVSSSELMQCEMSEVVRDG | 320 |
| rc           | QTKFDYSDELNADEENDTTEEGMSGSDTNNDTERNSGQLQLQMQDQLNMVSNHDQTIPNNAVSSSELMQCEMSEVVRDG | 320 |
| X134-#2      | QTKFDYSDELNADEENDTTEEGMSGSDTNNDTERNSGQLQLQMQDQLNMVSNHDQTIPNNAVSSSELMQCEMSEVVRDG | 320 |
| X134-#5      | QTKFDYSDELNADEENDTTEEGMSGSDTNNDTERNSGQLQLQMQDQLNMVSNHDQTIPNNAVSSSELMQCEMSEVVRDG | 320 |
| X134-#9 (2)  | QTKFDYSDELNADEENDTTEEGMSGSDTNNDTERNSGQLQLQMQDQLNMVSNHDQTIPNNAVSSSELMQCEMSEVVRDG | 320 |
| X134-#11     | QTKFDYSDELNADEENDTTEEGMSGSDTNNDTERNSGQLQLQMQDQLNMVSNHDQTIPNNAVSSSELMQCEMSEVVRDG | 320 |
| S143-#14     | QTKFDYSDELNADEENDTTEEGMSGSDTNNDTERNSGQLQLQMQDQLNMVSNHDQTIPNNAVSSSELMQCEMSEVVRDG | 320 |
| S143-#15     | QTKFDYSDELNADEENDTTEEGMSGSDTNNDTERNSGQLQLQMQDQLNMVSNHDQTIPNNAVSSSELMQCEMSEVVRDG | 320 |
| S143-#25     | QTKFDYSDELNADEENDTTEEGMSGSDTNNDTERNSGQLQLQMQDQLNMVSNHDQTIPNNAVSSSELMQCEMSEVVRDG | 320 |
| S143-#31 (1) | QTKFDYSDELNADEENDTTEEGMSGSDTNNDTERNSGQLQLQMQDQLNMVSNHDQTIPNNAVSSSELMQCEMSEVVRDG | 320 |
| S143-#32     | QTKFDYSDELNADEENDTTEEGMSGSDTNNDTERNSGQLQLQMQDQLNMVSNHDQTIPNNAVSSSELMQCEMSEVVRDG | 320 |
| ZNS-#15      | QTKFDYSDELNADEENDTTEEGMSGSDTNNDTERNSGQLQLQMQDQLNMVSNHDQTIPNNAVSSSELMQCEMSEVVRDG | 320 |
| ZNS-#25      | QTKFDYSDELNADEENDTTEEGMSGSDTNNDTERNSGQLQLQMQDQLNMVSNHDQTIPNNAVSSSELMQCEMSEVVRDG | 320 |

|              |                                                                                 |     |
|--------------|---------------------------------------------------------------------------------|-----|
| Rc           | CSNNILEDEIQMLMDCQNSNCQLNLQGPDEPCHSWHFLCEELQNDYQPATEDQVASPENTHYPKTLMTILHYNTRQQEM | 400 |
| rc           | CSNNILEDEIQMLMDCQNSNCQLNLQGPDEPCHSWHFLCEELQNDYQPATEDQVASPENTHYPKTLMTILHYNTRQQEM | 400 |
| X134-#2      | CSNNILEDEIQMLMDCQNSNCQLNLQGPDEPCHSWHFLCEELQNDYQPATEDQVASPENTHYPKTLMTILHYNTRQQEM | 400 |
| X134-#5      | CSNNILEDEIQMLMDCQNSNCQLNLQGPDEPCHSWHFLCEELQNDYQPATEDQVASPENTHYPKTLMTILHYNTRQQEM | 400 |
| X134-#9 (2)  | CSNNILEDEIQMLMDCQNSNCQLNLQGPDEPCHSWHFLCEELQNDYQPATEDQVASPENTHYPKTLMTILHYNTRQQEM | 400 |
| X134-#11     | CSNNILEDEIQMLMDCQNSNCQLNLQGPDEPCHSWHFLCEELQNDYQPATEDQVASPENTHYPKTLMTILHYNTRQQEM | 400 |
| S143-#14     | CSNNILEDEIQMLMDCQNSNCQLNLQGPDEPCHSWHFLCEELQNDYQPATEDQVASPENTHYPKTLMTILHYNTRQQEM | 400 |
| S143-#15     | CSNNILEDEIQMLMDCQNSNCQLNLQGPDEPCHSWHFLCEELQNDYQPATEDQVASPENTHYPKTLMTILHYNTRQQEM | 400 |
| S143-#25     | CSNNILEDEIQMLMDCQNSNCQLNLQGPDEPCHSWHFLCEELQNDYQPATEDQVASPENTHYPKTLMTILHYNTRQQEM | 400 |
| S143-#31 (1) | CSNNILEDEIQMLMDCQNSNCQLNLQGPDEPCHSWHFLCEELQNDYQPATEDQVASPENTHYPKTLMTILHYNTRQQEM | 400 |
| S143-#32     | CSNNILEDEIQMLMDCQNSNCQLNLQGPDEPCHSWHFLCEELQNDYQPATEDQVASPENTHYPKTLMTILHYNTRQQEM | 400 |
| ZNS-#15      | CSNNILEDEIQMLMDCQNSNCQLNLQGPDEPCHSWHFLCEELQNDYQPATEDQVASPENTHYPKTLMTILHYNTRQQEM | 400 |
| ZNS-#25      | CSNNILEDEIQMLMDCQNSNCQLNLQGPDEPCHSWHFLCEELQNDYQPATEDQVASPENTHYPKTLMTILHYNTRQQEM | 400 |

**Supplemental Figure 3. Multiple alignment of the deduced amino acid sequences of in-frame *Rc* variants.**

†X134-#2, X134-#4, X134-#9(1), S143-#21, ZNS-#2, ZNS-#3, ZNS-#4, ZNS-#7, ZNS-#9, ZNS-#19, ZNS-#20, ZNS-#22, and ZNS-#24 had an identical amino acid sequence.

‡ S143-#15, S143-#18, S143-#31(2) had an identical amino acid sequence.

|              |                                                                                   |     |
|--------------|-----------------------------------------------------------------------------------|-----|
| Rc           | NIKNYLPVSEKSSFSRWTTPEGSDDNKTMISPGTTQRLMKSILMIVPSSHCSYRGAETPESRGGKGASGTRVKVGAIQGDF | 480 |
| rc           | NIKNYLPVSEKSSFSRWTTPEGSDDNKTMISPGTTQRLMKSILMIVPSSHCSYRGAETPESRGGKGASGCHPR*-----   | 473 |
| X134-#2†     | NIKNYLPVSEKSSFSRWTTPEGSDDNKTMISPGTTQRLMKSILMIVPSSHCSYRGAETPESRGGKGASG-----CIQGDF  | 475 |
| X134-#5      | NIKNYLPVSEKSSFSRWTTPEGSDDNKTMISPGTTQRLMKSILMIVPSSHCSYRGAETPESRGGKGASG-----CIYDDF  | 475 |
| X134-#9 (2)  | NIKNYLPVSEKSSFSRWTTPEGSDDNKTMISPGTTQRLMKSILMIVPSSHCSYRGAETPESRGGKGASG-----DF      | 470 |
| X134-#11     | NIKNYLPVSEKSSFSRWTTPEGSDDNKTMISPGTTQRLMKSILMIVPSSHCSYRGAETPESRGGKGASG-----CDF     | 472 |
| S143-#14     | NIKNYLPVSEKSSFSRWTTPEGSDDNKTMISPGTTQRLMKSILMIVPSSHCSYRGAETPESRGGKGASG-----CIRDDF  | 475 |
| S143-#15‡    | NIKNYLPVSEKSSFSRWTTPEGSDDNKTMISPGTTQRLMKSILMIVPSSHCSYRGAETPESRGGKGASG-----CHQGDF  | 475 |
| S143-#25     | NIKNYLPVSEKSSFSRWTTPEGSDDNKTMISPGTTQRLMKSILMIVPSSHCSYRGAETPESRGGKGASG-----CNQGDF  | 475 |
| S143-#31 (1) | NIKNYLPVSEKSSFSRWTTPEGSDDNKTMISPGTTQRLMKSILMIVPSSHCSYRGAETPESRGGKGASG-----AIQGDF  | 475 |
| S143-#32     | NIKNYLPVSEKSSFSRWTTPEGSDDNKTMISPGTTQRLMKSILMIVPSSHCSYRGAETPESRGGKGASG-----FQGDF   | 474 |
| ZNS-#15      | NIKNYLPVSEKSSFSRWTTPEGSDDNKTMISPGTTQRLMKSILMIVPSSHCSYRGAETPESRGGKGASG-----CLYGDF  | 475 |
| ZNS-#25      | NIKNYLPVSEKSSFSRWTTPEGSDDNKTMISPGTTQRLMKSILMIVPSSHCSYRGAETPESRGGKGASG-----QGDF    | 472 |

**bHLH**

|              |                                                                                                                  |     |
|--------------|------------------------------------------------------------------------------------------------------------------|-----|
| Rc           | SANHV <b>VLKERRRREKLN</b> EFII <b>LRSLVPFMTKMDKASILGDTIEYVKQLRNRIQE</b> LESSSSSSRAAARAPSA <del>AAAA</del> GRRRKR | 560 |
| rc           | -----                                                                                                            | 473 |
| X134-#2      | SANHV <b>VLKERRRREKLN</b> EFII <b>LRSLVPFMTKMDKASILGDTIEYVKQLRNRIQE</b> LESSSSSSRAAARAPSA <del>AAAA</del> GRRRKR | 555 |
| X134-#5      | SANHV <b>VLKERRRREKLN</b> EFII <b>LRSLVPFMTKMDKASILGDTIEYVKQLRNRIQE</b> LESSSSSSRAAARAPSA <del>AAAA</del> GRRRKR | 555 |
| X134-#9 (2)  | SANHV <b>VLKERRRREKLN</b> EFII <b>LRSLVPFMTKMDKASILGDTIEYVKQLRNRIQE</b> LESSSSSSRAAARAPSA <del>AAAA</del> GRRRKR | 550 |
| X134-#11     | SANHV <b>VLKERRRREKLN</b> EFII <b>LRSLVPFMTKMDKASILGDTIEYVKQLRNRIQE</b> LESSSSSSRAAARAPSA <del>AAAA</del> GRRRKR | 552 |
| S143-#14     | SANHV <b>VLKERRRREKLN</b> EFII <b>LRSLVPFMTKMDKASILGDTIEYVKQLRNRIQE</b> LESSSSSSRAAARAPSA <del>AAAA</del> GRRRKR | 555 |
| S143-#15     | SANHV <b>VLKERRRREKLN</b> EFII <b>LRSLVPFMTKMDKASILGDTIEYVKQLRNRIQE</b> LESSSSSSRAAARAPSA <del>AAAA</del> GRRRKR | 555 |
| S143-#25     | SANHV <b>VLKERRRREKLN</b> EFII <b>LRSLVPFMTKMDKASILGDTIEYVKQLRNRIQE</b> LESSSSSSRAAARAPSA <del>AAAA</del> GRRRKR | 555 |
| S143-#31 (1) | SANHV <b>VLKERRRREKLN</b> EFII <b>LRSLVPFMTKMDKASILGDTIEYVKQLRNRIQE</b> LESSSSSSRAAARAPSA <del>AAAA</del> GRRRKR | 555 |
| S143-#32     | SANHV <b>VLKERRRREKLN</b> EFII <b>LRSLVPFMTKMDKASILGDTIEYVKQLRNRIQE</b> LESSSSSSRAAARAPSA <del>AAAA</del> GRRRKR | 554 |
| ZNS-#15      | SANHV <b>VLKERRRREKLN</b> EFII <b>LRSLVPFMTKMDKASILGDTIEYVKQLRNRIQE</b> LESSSSSSRAAARAPSA <del>AAAA</del> GRRRKR | 555 |
| ZNS-#25      | SANHV <b>VLKERRRREKLN</b> EFII <b>LRSLVPFMTKMDKASILGDTIEYVKQLRNRIQE</b> LESSSSSSRAAARAPSA <del>AAAA</del> GRRRKR | 552 |

|              |                                                                                 |     |
|--------------|---------------------------------------------------------------------------------|-----|
| Rc           | SAAAAATAAEGMSSSNGRNGGEEAAEVVQVSIIESDALLELRCGCGGGGGVVLLRVMQAMQELQLEVTAVQASCAGGEL | 640 |
| rc           | -----                                                                           | 473 |
| X134-#2      | SAAAAATAAEGMSSSNGRNGGEEAAEVVQVSIIESDALLELRCGCGGGGGVVLLRVMQAMQELQLEVTAVQASCAGGEL | 635 |
| X134-#5      | SAAAAATAAEGMSSSNGRNGGEEAAEVVQVSIIESDALLELRCGCGGGGGVVLLRVMQAMQELQLEVTAVQASCAGGEL | 635 |
| X134-#9 (2)  | SAAAAATAAEGMSSSNGRNGGEEAAEVVQVSIIESDALLELRCGCGGGGGVVLLRVMQAMQELQLEVTAVQASCAGGEL | 630 |
| X134-#11     | SAAAAATAAEGMSSSNGRNGGEEAAEVVQVSIIESDALLELRCGCGGGGGVVLLRVMQAMQELQLEVTAVQASCAGGEL | 632 |
| S143-#14     | SAAAAATAAEGMSSSNGRNGGEEAAEVVQVSIIESDALLELRCGCGGGGGVVLLRVMQAMQELQLEVTAVQASCAGGEL | 635 |
| S143-#15     | SAAAAATAAEGMSSSNGRNGGEEAAEVVQVSIIESDALLELRCGCGGGGGVVLLRVMQAMQELQLEVTAVQASCAGGEL | 635 |
| S143-#25     | SAAAAATAAEGMSSSNGRNGGEEAAEVVQVSIIESDALLELRCGCGGGGGVVLLRVMQAMQELQLEVTAVQASCAGGEL | 635 |
| S143-#31 (1) | SAAAAATAAEGMSSSNGRNGGEEAAEVVQVSIIESDALLELRCGCGGGGGVVLLRVMQAMQELQLEVTAVQASCAGGEL | 635 |
| S143-#32     | SAAAAATAAEGMSSSNGRNGGEEAAEVVQVSIIESDALLELRCGCGGGGGVVLLRVMQAMQELQLEVTAVQASCAGGEL | 634 |
| ZNS-#15      | SAAAAATAAEGMSSSNGRNGGEEAAEVVQVSIIESDALLELRCGCGGGGGVVLLRVMQAMQELQLEVTAVQASCAGGEL | 635 |
| ZNS-#25      | SAAAAATAAEGMSSSNGRNGGEEAAEVVQVSIIESDALLELRCGCGGGGGVVLLRVMQAMQELQLEVTAVQASCAGGEL | 632 |

|              |                           |     |
|--------------|---------------------------|-----|
| Rc           | LAELRAKVVVMILICMKMQMQMQN* | 666 |
| rc           | -----                     | 473 |
| X134-#2      | LAELRAKVVVMILICMKMQMQMQN* | 661 |
| X134-#5      | LAELRAKVVVMILICMKMQMQMQN* | 661 |
| X134-#9 (2)  | LAELRAKVVVMILICMKMQMQMQN* | 656 |
| X134-#11     | LAELRAKVVVMILICMKMQMQMQN* | 658 |
| S143-#14     | LAELRAKVVVMILICMKMQMQMQN* | 661 |
| S143-#15     | LAELRAKVVVMILICMKMQMQMQN* | 661 |
| S143-#25     | LAELRAKVVVMILICMKMQMQMQN* | 661 |
| S143-#31 (1) | LAELRAKVVVMILICMKMQMQMQN* | 661 |
| S143-#32     | LAELRAKVVVMILICMKMQMQMQN* | 660 |
| ZNS-#15      | LAELRAKVVVMILICMKMQMQMQN* | 661 |
| ZNS-#25      | LAELRAKVVVMILICMKMQMQMQN* | 658 |

**Supplemental Figure 3. Multiple alignment of the deduced amino acid sequences of in-frame Rc variants (continued).**

†X134-#2, X134-#4, X134-#9(1), S143-#21, ZNS-#2, ZNS-#3, ZNS-#4, ZNS-#7, ZNS-#9, ZNS-#19, ZNS-#20, ZNS-#22, and ZNS-#24 had an identical amino acid sequence.

‡S143-#15, S143-#18, S143-#31(2) had an identical amino acid sequence.
