# Supplementary material for: CRISPR/Cas9‐mediated functional recovery of the recessive rc allele to develop red rice
Source: PubMed Central journal article supplement — Plant Biotechnol J. 2019 May 7;17(11):2096–105. doi: 10.1111/pbi.13125 (PMC6790373; doi:10.1111/pbi.13125), 2019-05-07
Supplement: PBI-17-2096-s004.pdf [file PBI-17-2096-s004.pdf]

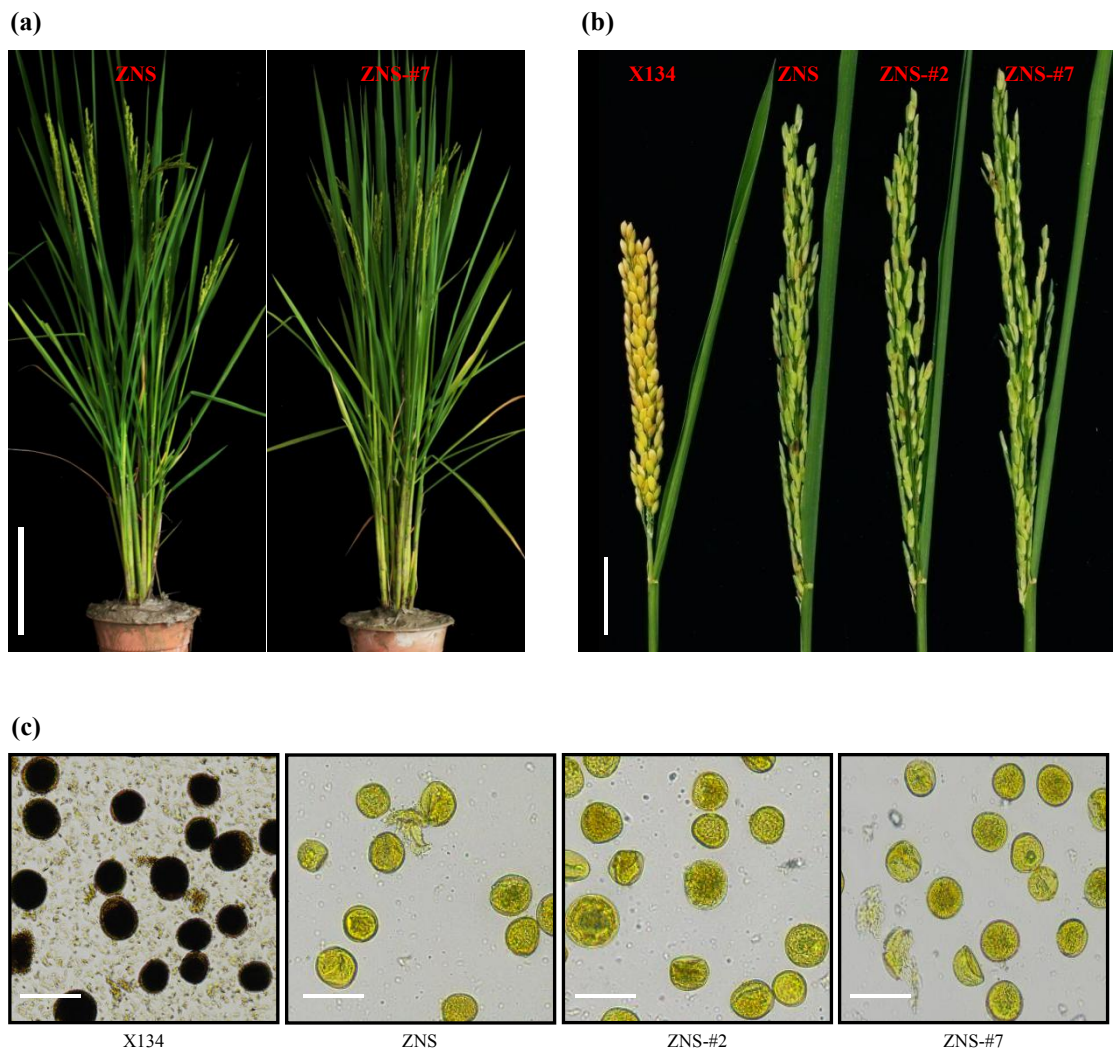

**Supplemental Figure 4. In-frame *Rc* mutants in ZNS background displayed an identical male sterility phenotype as their wild type.**  
 (a) Morphological phenotypes of wild type ZNS and in-frame *Rc* mutant ZNS-#7. Scale bar: 20cm.  
 (b) Pollen sterility in wild type ZNS and in-frame *Rc* mutants ZNS-#2, and ZNS-#7. Pollens were stained with 1% KI solution. Fertile pollens of X134 were used as a positive control. Scale bar: 3 cm.  
 (c) Sterile panicles of wild type ZNS and in-frame *Rc* mutants ZNS-#2, and ZNS-#7. Fertile panicle of X134 was used as a positive control. Scale bar: 50  $\mu$ m.
