# Supplementary material for: CRISPR/Cas9‐mediated functional recovery of the recessive rc allele to develop red rice
Source: PubMed Central journal article supplement — Plant Biotechnol J. 2019 May 7;17(11):2096–105. doi: 10.1111/pbi.13125 (PMC6790373; doi:10.1111/pbi.13125), 2019-05-07
Supplement: PBI-17-2096-s005.pdf [file PBI-17-2096-s005.pdf]

(a)

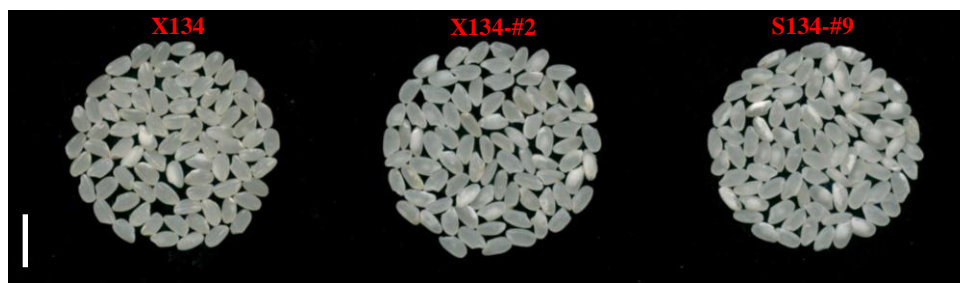

(b)

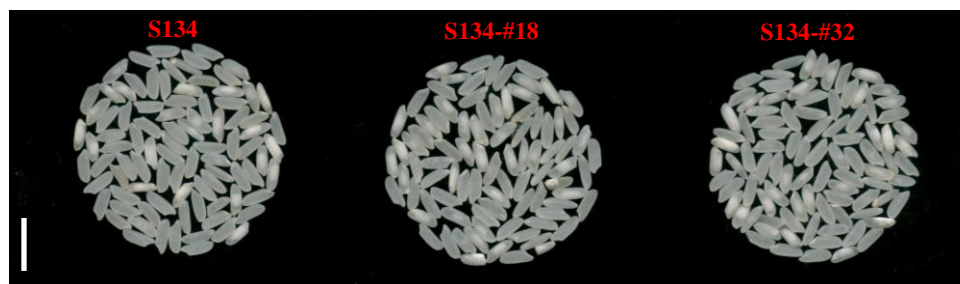

(c)

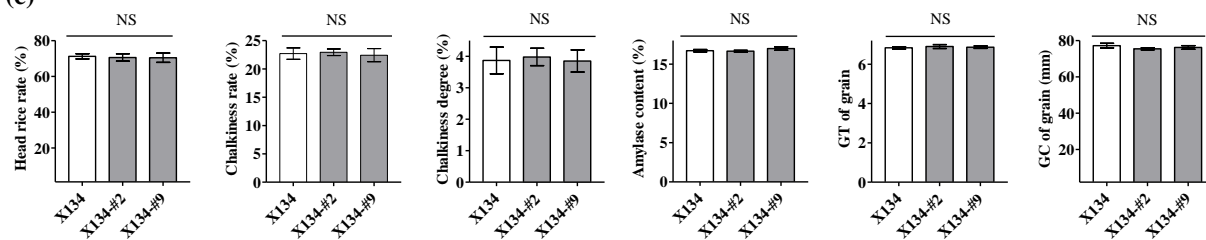

(d)

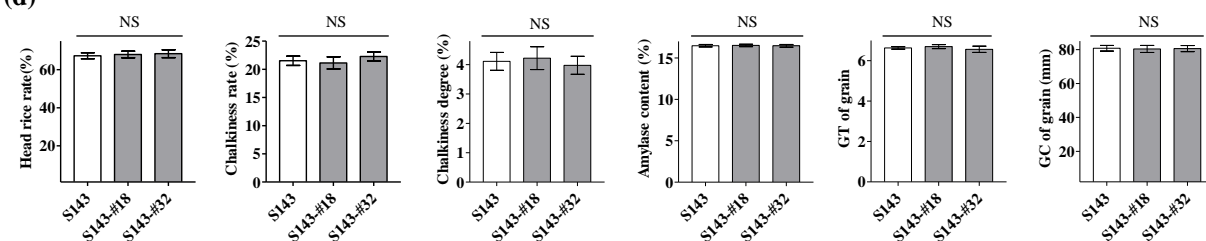

**Supplemental Figure 5. In-frame *Rc* mutants and their corresponding wild types showed no significant differences in major grain quality traits.**

(a, b) Appearance of polished grains without pericarp from in-frame *Rc* mutants and their corresponding wild types X134 and S143. Scale bar: 1 cm.

(c, d) Head rice rate, chalkiness rate, chalkiness degree, amylase content, gelatinization temperature (GT) of grain, and gel consistency (GC) in in-frame *Rc* mutants and their corresponding wild types X134 and S143. NS: no significant difference.
